# Supplementary material
Source: PubMed Central journal article supplement (PMC3935248)
Supplement: NIHMS484057-supplement-0_3.pdf [file NIHMS484057-supplement-0_3.pdf]

**SUPPLEMENT TO “BAYESIAN SEMIPARAMETRIC ANALYSIS FOR  
TWO-PHASE STUDIES OF GENE-ENVIRONMENT INTERACTION”**

BY JAEIL AHN, BHARAMAR MUKHERJEE, STEPHEN B. GRUBER AND MALAY  
GHOSH

SUPPLEMENTARY MATERIAL

**1. Appendix.**

1.1. *Dunson and Xing (2009) Update*:. We describe the posterior sampling steps in relation to parameters in  $P(\mathbf{W}|\boldsymbol{\theta})$ ,  $\boldsymbol{\theta} = \{\boldsymbol{\psi}, \mathbf{V}, \alpha\}$ , by following Dunson and Xing (2009). They introduce a vector of latent variables  $\mathbf{u} = \{u_1, \dots, u_N\}$ ,  $u_u > 0$ . The joint distribution of  $\mathbf{u}, \mathbf{w}|\mathbf{V}, \boldsymbol{\psi}, \alpha$  is defined as,

$$(1.1) \quad \prod_{u=1}^N \left\{ \sum_{h \in A_{uv}} \prod_{j=1}^p \prod_{l=1}^{d_j} \psi_{hl}^{(j)I(w_{uj}=l)} \right\},$$

where  $A_{uv} = \{h : \nu_h > z_u\}$  and  $\nu_h = V_h \prod_{l < h} (1 - V_l)$ . The joint posterior is then the product of the augmented data likelihood (1.1) and respective priors on  $\mathbf{V}, \boldsymbol{\psi}, \alpha$ . The augmented data Gibbs sampling is based on the following steps.

- (a) We start with the simplest one. Update  $u_u$  for  $u = 1, \dots, N$ , by sampling from  $U(0, \nu_{z_u})$
- (b) Next step is regarding  $\boldsymbol{\psi}_h^{(j)}$ . Note that we can find  $h^* = \max\{z_1, \dots, z_N\}$  such that we do not need to compute any conditionals  $h > h^*$  later on. And we notice that

$$\pi(\boldsymbol{\psi}_h^{(j)}|\cdot) \propto \text{Dirichlet}(a_{j1}, \dots, a_{jd_j}) \times \prod_{u=1}^N \prod_{l=1}^{d_j} \psi_{hl}^{(j)I(w_{uj}=l)}.$$

Due to the conjugate prior, the posterior conditional for  $j$ -th response when  $z_u = h$  is given as

$$\text{Dirichlet} \left( a_{j1} + \sum_{u:z_u=h} I(w_{uj} = 1), \dots, a_{jd_j} + \sum_{u:z_u=h} I(w_{uj} = dj) \right).$$

- (c) The conditionals with respect to  $V_h$  is

$$\pi(V_h|\cdot) \propto (1 - V_h)^{\alpha-1} \times \prod_{u=1}^N I(u_u < V_h) \prod_{l < h} (1 - V_l).$$

If we focus on the latter part, we can obtain a  $\text{beta}(1, \alpha)$  distribution truncated at

$$\left[ \max_{u: z_u=h} \left\{ \frac{u_u}{\prod_{l < h} (1 - V_l)} \right\}, 1 - \max_{u: z_u > h} \left\{ \frac{u_u}{V_{z_u} \prod_{l < z_u, l \neq h} (1 - V_l)} \right\} \right].$$

(d) Update  $z_u$  from the multinomial full conditional as given,

$$\Pr(z_u = h | \cdot) = \frac{I(\nu_h > u_u) \prod_{j=1}^p \psi_{hw_{uj}}^{(j)}}{\sum_{l \in A_{uv}} \prod_{j=1}^p \psi_{lw_{uj}}^{(j)}}, \quad u = 1, \dots, N.$$

As discussed in Walker (2007), we will be in trouble without latent variables  $\mathbf{u}$  in that the choice of  $z_u$  can be infinite. Since the number of subjects in the dataset itself is finite, the cardinality of the set  $A_{iv}$  is finite. To validate this argument, we need to find the smallest  $k^*$  such that  $\sum_{h=1}^{k^*} \nu_h > 1 - \min\{u_1, \dots, u_N\}$ . Noticing that  $\sum_{h=1}^{\infty} \nu_h$  is monotonically increasing and  $\sum_{h=1}^{\infty} \nu_h = 1$ , we can compute the desired  $k^*$ .

(e) In the last step, we update  $\alpha$  from

$$\text{Gamma} \left( a_\alpha + h^*, b_\alpha - \sum_{h=1}^{h^*} \log(1 - V_h) \right)$$

Above steps are equivalent to Dunson and Xing (2009) except we set the maximum of the number of mixtures  $k$  such that  $\text{argmin} \sum_{h=1}^k \nu_h > 0.99$  to avoid possible large number of mixtures, theoretically up to the data size  $N$ . This can lead to the bias which has little influence overall. In such a situation, we adjust  $V_h$  and  $\nu_h$  to satisfy  $\sum_h^k \nu_h = 1$ . The practical gain from this method is that we can resort to known posterior sampling distributions and can anticipate facilitating the process.

TABLE 1

*Stratified contingency table containing frequency of different configurations defined by levels of RS1800775 on CETP ( $G_1$ ) and RS1056836 on CYP1B1 ( $G_2$ ), statins ( $E$ ), and disease status. The frequencies are based on completely observed 2,334 subjects at phase II*

|          | CETP (RS1800775) |     |      |     |       |       | CYP1B1 (RS1056836) |     |      |     |       |
|----------|------------------|-----|------|-----|-------|-------|--------------------|-----|------|-----|-------|
|          | Control          |     | Case |     | Total |       | Control            |     | Case |     | Total |
|          | E=0              | E=1 | E=0  | E=1 |       |       | E=0                | E=1 | E=0  | E=1 |       |
| G=0(A/A) | 347              | 67  | 354  | 21  | 789   | (C/C) | 294                | 72  | 347  | 20  | 733   |
| G=1(A/C) | 373              | 97  | 454  | 44  | 968   | (G/C) | 471                | 97  | 522  | 51  | 1141  |
| G=2(C/C) | 233              | 54  | 267  | 33  | 587   | (G/G) | 188                | 49  | 206  | 27  | 470   |
| Total    | 953              | 218 | 1075 | 98  | 2344  |       | 953                | 218 | 1075 | 98  | 2344  |

TABLE 2

Simulation results under exposure enriched sampling with all  $E = 1$  in phase I data are selected in phase II for both cases and controls. We consider two association scenarios: 1)  $G_1 \perp E$ ,  $G_1 \perp G_2$ , and  $G_2 \perp E$  association, 2)  $G_1 \perp E$ ,  $G_1 \sim G_2$ , and  $G_2 \sim E$ . The results are based on 200 replicated datasets, each with 1,000 cases and 1,000 controls in phase I and 800 cases and 800 controls in phase II. The approaches listed, TPFB, TPFB<sub>emp</sub>, WL, PL, UML, CML, and EB where each represents Two-phase full Bayes (with empirically obtained prior variance), Weighted likelihood, Pseudolikelihood, Unconstrained Maximum Likelihood, Constrained Maximum Likelihood, and Empirical Bayes respectively. The CML imposes  $G_1$ - $E$  and  $G_1$ - $G_2$  independence, however, no constraints on  $G_2$ - $E$  association. We set  $(\beta_E, \beta_{G_1 E}, \beta_{G_2 E}) = (-1.5, 0, \log(2))$ ,  $\log(2)$  for all scenarios. The rows with the two smallest sum(MSE) are in bold.

| Stratified sampling (a) <sup>†</sup> | E    |                  | $G_1 \perp E, G_1 \perp G_2, G_2 \perp E$                           |                | $G_1 \perp E, G_1 \sim G_2, G_2 \sim E$ |                                                                                   | Sum <sup>‡</sup> |
|--------------------------------------|------|------------------|---------------------------------------------------------------------|----------------|-----------------------------------------|-----------------------------------------------------------------------------------|------------------|
|                                      | E    | $G_1 \times G_2$ | $G_1 \times E$                                                      | $G_2 \times E$ | $G_1 \times E$                          | $G_2 \times E$                                                                    |                  |
| TPFB                                 | Bias | 0.019            | $(\lambda_{G_1 G_2}, \lambda_{G_1 E}, \lambda_{G_2 E}) = (0, 0, 0)$ | -0.022         | -0.070                                  | $(\lambda_{G_1 G_2}, \lambda_{G_1 E}, \lambda_{G_2 E}) = (\log(2), 0, \log(1.5))$ | 0.190            |
|                                      | MSE  | (0.079)          | (0.035)                                                             | (0.101)        | (0.095)                                 | (0.109)                                                                           | (0.111)          |
| TPFB <sub>emp</sub>                  | Bias | 0.019            | 0.038                                                               | -0.086         | -0.109                                  | -0.086                                                                            | 0.126            |
|                                      | MSE  | (0.079)          | (0.015)                                                             | (0.105)        | (0.090)                                 | (0.103)                                                                           | (0.109)          |
| WL                                   | Bias | -0.030           | -0.009                                                              | 0.049          | 0.030                                   | -0.074                                                                            | 0.071            |
|                                      | MSE  | (0.097)          | (0.050)                                                             | (0.147)        | (0.134)                                 | (0.132)                                                                           | (0.137)          |
| PL                                   | Bias | -0.030           | -0.010                                                              | 0.050          | 0.030                                   | -0.074                                                                            | 0.071            |
|                                      | MSE  | (0.097)          | (0.049)                                                             | (0.146)        | (0.134)                                 | (0.132)                                                                           | (0.137)          |
| UML                                  | Bias | -0.049           | -0.010                                                              | 0.050          | 0.030                                   | -0.095                                                                            | 0.071            |
|                                      | MSE  | (0.099)          | (0.049)                                                             | (0.146)        | (0.134)                                 | (0.135)                                                                           | (0.137)          |
| CML                                  | Bias | -0.042           | -0.007                                                              | 0.042          | 0.009                                   | -0.080                                                                            | 0.061            |
|                                      | MSE  | (0.086)          | (0.023)                                                             | (0.088)        | (0.123)                                 | (0.117)                                                                           | (0.128)          |
| EB                                   | Bias | -0.044           | -0.010                                                              | 0.042          | 0.014                                   | -0.083                                                                            | 0.062            |
|                                      | MSE  | (0.089)          | (0.030)                                                             | (0.104)        | (0.126)                                 | (0.119)                                                                           | (0.129)          |

<sup>†</sup>All subjects with  $E = 1$  in case and control are sub-sampled for phase II.

<sup>‡</sup>The combined MSEs over all four parameters.

TPFB uses the informative prior  $N(0, 10^{-2})$  on  $G$ - $G$  and  $G$ - $E$  associations in the model (??)

TPFB<sub>emp</sub> uses the prior  $N(0, \hat{\theta}^2)$  on  $G$ - $G$  and  $G$ - $E$  associations in the model (??) where

$\hat{\theta}^2$  is empirically estimated  $G$ - $G$  or  $G$ - $E$  association parameter under controls.

TABLE 3

Simulation results under **NO** exposure enriched sampling in phase II. A random sample of cases and controls from phase I are selected for genotyping in phase II. We consider two association scenarios 1)  $G_1 \perp E$ ,  $G_1 \perp G_2$ , and  $G_2 \perp E$  association, 2)  $G_1 \perp E$ ,  $G_1 \sim G_2$ , and  $G_2 \sim E$ . The results are based on 1,000 replicated datasets, each with 1,000 cases and 1,000 controls in phase I and 600 cases and 600 controls in phase II. The approaches listed, *TPFB*, *TPFB<sub>emp</sub>*, *WL*, *PL*, *UML*, *CML*, and *EB* where each represents Two-phase full Bayes (with empirically obtained prior variance), Weighted likelihood, Pseudolikelihood, Unconstrained Maximum Likelihood, Constrained Maximum Likelihood, and Empirical Bayes respectively. The *CML* imposes  $G_1-E$  and  $G_1-G_2$  independence, however, no constraints on  $G_2-E$  association. We set  $(\beta_E, \beta_{G_1 G_2}, \beta_{G_1 E}, \beta_{G_2 E}) = (-1.5, 0, \log(2), \log(2))$  for all scenarios. The rows with the two smallest sum(MSE) are in bold.

| Random sampling †   | $G_1 \perp E, G_1 \perp G_2, G_2 \perp E$ |                   |                   |                   | $G_1 \perp E, G_1 \sim G_2, G_2 \sim E$ |                   |                   |                  |
|---------------------|-------------------------------------------|-------------------|-------------------|-------------------|-----------------------------------------|-------------------|-------------------|------------------|
|                     | E                                         | $G_1 \times G_2$  | $G_1 \times E$    | $G_2 \times E$    | E                                       | $G_1 \times G_2$  | $G_1 \times E$    | $G_2 \times E$   |
| TPFB                | Bias<br>(MSE)                             | -0.055<br>(0.138) | -0.007<br>(0.059) | -0.024<br>(0.199) | -0.119<br>(0.173)                       | 0.151<br>(0.070)  | -0.025<br>(0.139) | 0.197<br>(0.207) |
| TPFB <sub>emp</sub> | Bias<br>(MSE)                             | -0.019<br>(0.138) | -0.051<br>(0.188) | -0.055<br>(0.179) | -0.056<br>(0.167)                       | 0.025<br>(0.056)  | -0.055<br>(0.154) | 0.092<br>(0.206) |
| WL                  | Bias<br>(MSE)                             | -0.070<br>(0.157) | 0.037<br>(0.070)  | 0.019<br>(0.225)  | -0.056<br>(0.167)                       | -0.007<br>(0.052) | -0.013<br>(0.180) | 0.071<br>(0.204) |
| PL                  | Bias<br>(MSE)                             | -0.070<br>(0.157) | 0.013<br>(0.070)  | 0.020<br>(0.225)  | -0.056<br>(0.167)                       | -0.006<br>(0.052) | -0.013<br>(0.179) | 0.071<br>(0.204) |
| UML                 | Bias<br>(MSE)                             | -0.065<br>(0.163) | 0.038<br>(0.070)  | 0.020<br>(0.225)  | -0.065<br>(0.191)                       | -0.006<br>(0.052) | -0.013<br>(0.179) | 0.071<br>(0.204) |
| CML                 | Bias<br>(MSE)                             | -0.056<br>(0.139) | 0.006<br>(0.036)  | 0.015<br>(0.204)  | -0.087<br>(0.181)                       | 0.697<br>(0.512)  | 0.026<br>(0.108)  | 0.069<br>(0.190) |
| EB                  | Bias<br>(MSE)                             | -0.059<br>(0.143) | 0.010<br>(0.048)  | 0.017<br>(0.207)  | -0.084<br>(0.181)                       | 0.069<br>(0.061)  | 0.009<br>(0.124)  | 0.068<br>(0.191) |

†In terms of stratified sampling, 600 cases and 600 control are randomly selected for phase II, respectively.

‡The combined MSEs over all four parameters.

TPFB uses the informative prior  $N(0, 10^{-2})$  on  $G-G$  and  $G-E$  associations in the model.

TPFB<sub>emp</sub> uses the prior  $N(0, \hat{\theta}^2)$  on  $G-G$  and  $G-E$  associations in the model where

$\hat{\theta}^2$  is empirically estimated  $G-G$  or  $G-E$  association parameter under controls.

**Supplement: C source code**

(<http://www.umich.edu/~jaeil/tp.zip>). Zipped C-code for MECC data analysis

**References.**

- [1] DUNSON, D. B. and XING, C. (2009). Nonparametric Bayes Modeling of Multivariate Categorical Data. *Journal Amer. Stat. Assoc.* **104** 1042–1051.
- [2] WALKER, S. G. (2007). Sampling the Dirichlet Mixture Model With Slices. *Simulation and Computation* **36** 45–54.
